# Supplementary material for: The Incremental Value of Repeated Induced Sputum and Gastric Aspirate Samples for the Diagnosis of Pulmonary Tuberculosis in Young Children With Acute Community-Acquired Pneumonia
Source: PubMed Central journal article supplement (PMC5447846; doi:10.1093/cid/cix099), 2017-05-27
Supplement: cix099_suppl_DAP_16_Submission_to_CID_supplementary_material_24Oct2016.pdf [file cix099_suppl_DAP_16_Submission_to_CID_supplementary_material_24Oct2016.pdf]

Supplemental Materials: Induced Sputum for Child TB Diagnosis

Supplementary Figure 1. Number of Induced Sputum (IS) and Gastric Aspirate (GA) Samples Available for Mycobacterial Culture Yield Analyses

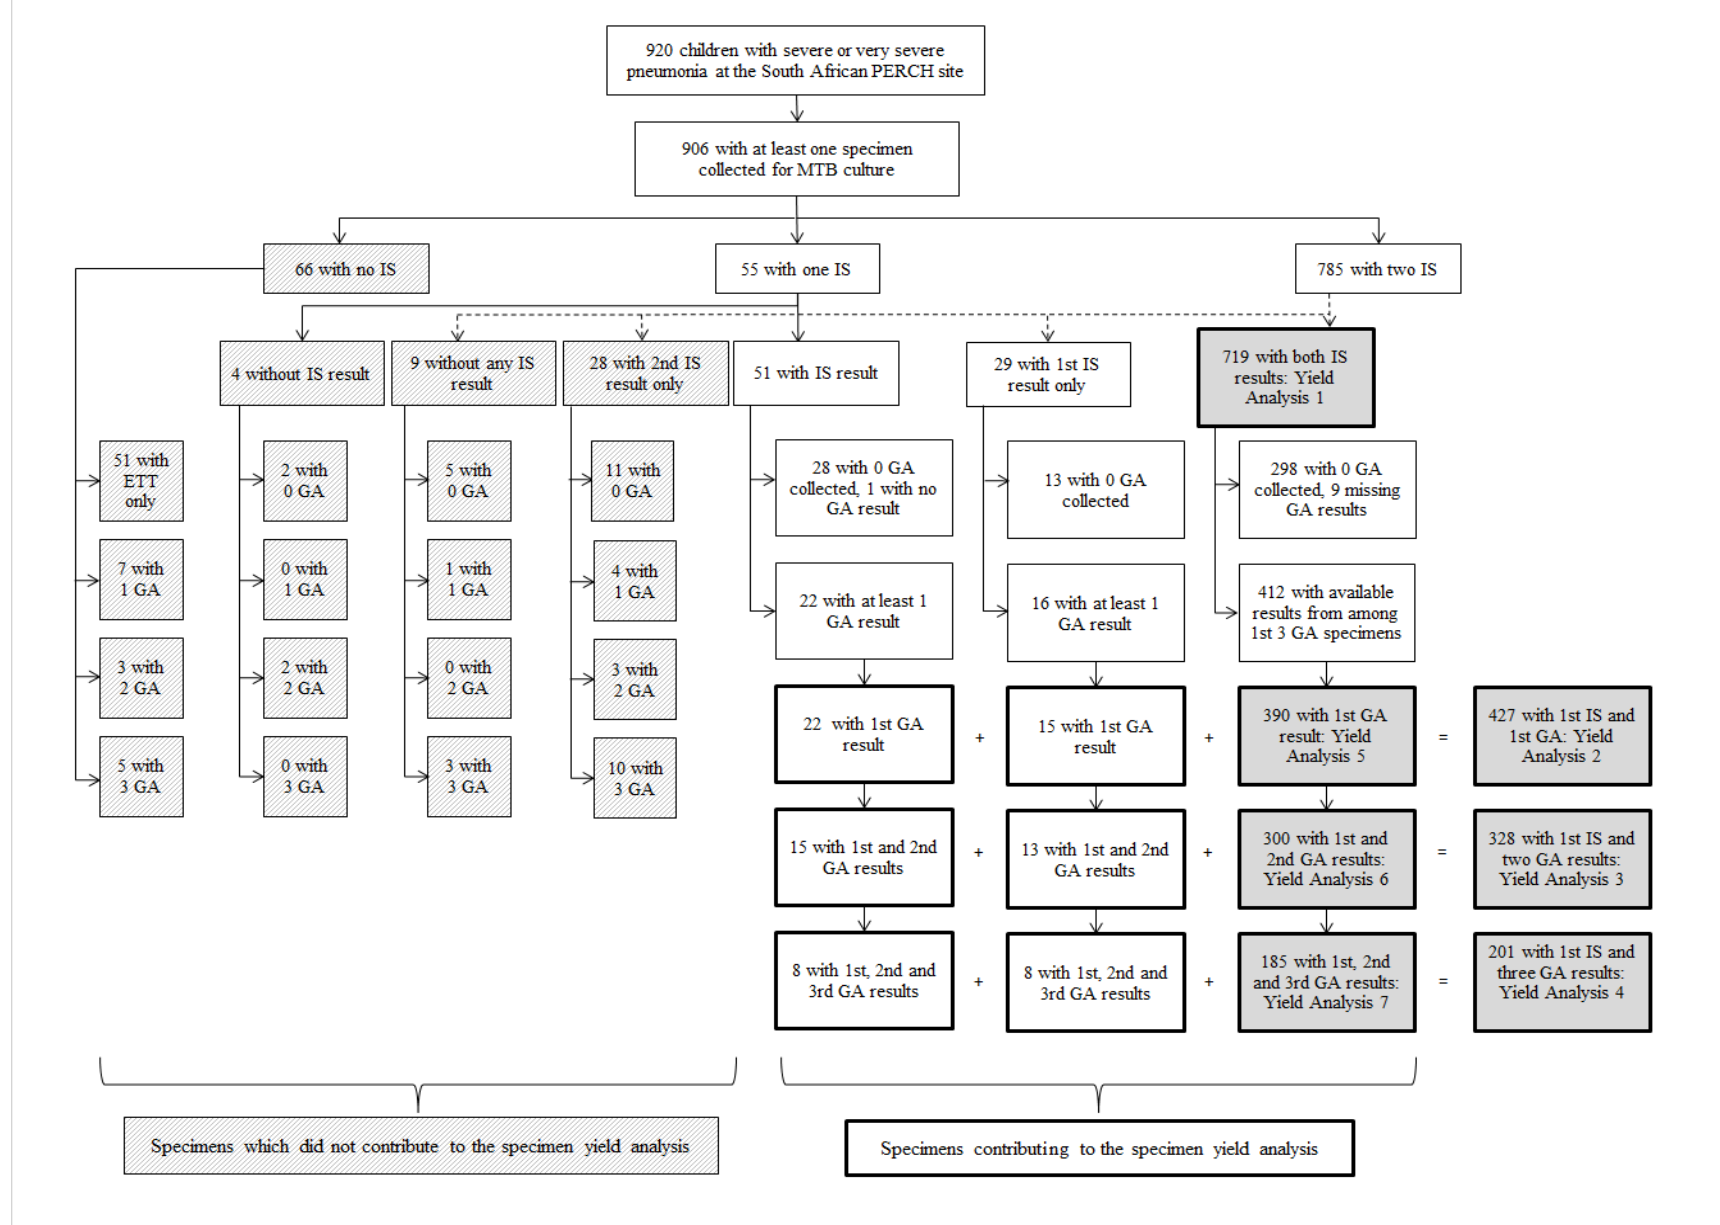

Supplementary Table 1. Characteristics of Cases with and without Gastric Aspirates (GA) Collected

|                                    | GA Collected<br>(N=498) |      | No GA collected<br>(N=422) |      | P-value <sup>a</sup> | Odds Ratio<br>(95% CI) <sup>b</sup> | Adjusted Odds Ratio<br>(95% CI) <sup>c</sup> |
|------------------------------------|-------------------------|------|----------------------------|------|----------------------|-------------------------------------|----------------------------------------------|
|                                    | n                       | %    | n                          | %    |                      |                                     |                                              |
| Age Group                          |                         |      |                            |      |                      |                                     |                                              |
| 1-5 months                         | 223                     | 44.8 | 235                        | 55.8 |                      | Ref                                 | Ref                                          |
| 6-11 months                        | 140                     | 28.1 | 85                         | 20.2 | .003                 | 1.74 (1.25 to 2.40)                 | 3.36 (1.45 to 7.75)                          |
| 12-23 months                       | 94                      | 18.9 | 63                         | 15.0 |                      | 1.57 (1.09 to 2.27)                 | 3.05 (1.14 to 8.15)                          |
| 24-59 months                       | 41                      | 8.2  | 38                         | 9.0  |                      | 1.14 (0.71 to 1.83)                 | 20.76 (1.98 to 217.20)                       |
| Sex                                |                         |      |                            |      |                      |                                     |                                              |
| Female                             | 230                     | 46.2 | 204                        | 48.5 | .49                  | 0.91 (0.70 to 1.19)                 |                                              |
| Male                               | 268                     | 53.8 | 217                        | 51.5 |                      | Ref                                 |                                              |
| Severity                           |                         |      |                            |      |                      |                                     |                                              |
| Severe pneumonia                   | 361                     | 72.5 | 260                        | 61.8 | .001                 | Ref                                 |                                              |
| Very severe pneumonia              | 137                     | 27.5 | 161                        | 38.2 |                      | 0.61 (0.46 to 0.82)                 |                                              |
| Died                               |                         |      |                            |      |                      |                                     |                                              |
| Died in hospital                   | 12                      | 2.4  | 26                         | 6.2  | .004                 | 0.38 (0.17 to 0.78)                 |                                              |
| Died within 30 days <sup>d</sup>   | 16                      | 3.7  | 33                         | 8.9  | .003                 | 0.41 (0.21 to 0.79)                 |                                              |
| HIV infection                      | 80                      | 16.1 | 35                         | 8.3  | <.001                | 2.11 (1.36 to 3.31)                 |                                              |
| Pneumonia severity signs           |                         |      |                            |      |                      |                                     |                                              |
| Lower chest wall indrawing         | 482                     | 96.8 | 399                        | 94.8 | .12                  | 1.66 (0.82 to 3.43)                 |                                              |
| Head nodding                       | 118                     | 23.7 | 128                        | 30.4 | .02                  | 0.71 (0.52 to 0.96)                 |                                              |
| Unable to feed/vomiting everything | 12                      | 2.4  | 32                         | 7.6  | <.001                | 0.30 (0.14 to 0.61)                 |                                              |
| Central cyanosis                   | 7                       | 1.4  | 11                         | 2.6  | .19                  | 0.53 (0.17 to 1.52)                 |                                              |
| Lethargy                           | 17                      | 3.4  | 35                         | 8.3  | .001                 | 0.39 (0.20 to 0.73)                 |                                              |
| Multiple or prolonged convulsions  | 3                       | 0.6  | 9                          | 2.1  | .08                  | 0.28 (0.05 to 1.12)                 |                                              |
| Hypoxemia <sup>e</sup>             | 367                     | 73.8 | 323                        | 77.3 | .23                  | 0.83 (0.61 to 1.13)                 |                                              |
| Tachypnea <sup>f</sup>             | 396                     | 80.5 | 308                        | 75.3 | .06                  | 1.35 (0.99 to 1.86)                 |                                              |

Supplementary Table 1. Characteristics of Cases with and without Gastric Aspirates (GA) Collected (*continued*)

|                                       | GA Collected<br>(N=498) |      | No GA collected<br>(N=422) |      | P-value <sup>a</sup> | Odds Ratio<br>(95%CI) <sup>b</sup> | Adjusted Odds<br>Ratio (95%CI) <sup>c</sup> |
|---------------------------------------|-------------------------|------|----------------------------|------|----------------------|------------------------------------|---------------------------------------------|
|                                       | n                       | %    | n                          | %    |                      |                                    |                                             |
| Chest radiograph                      |                         |      |                            |      |                      |                                    |                                             |
| Normal                                | 125                     | 29.2 | 133                        | 37.7 | .01                  | Ref                                | 3.36 (1.45 to 7.75)                         |
| Abnormal <sup>§</sup>                 | 303                     | 70.8 | 220                        | 62.3 |                      |                                    |                                             |
| Malnutrition (weight for age z-score) |                         |      |                            |      |                      |                                    |                                             |
| Normal                                | 347                     | 69.8 | 294                        | 70.7 | .39                  | Ref                                |                                             |
| Moderate                              | 75                      | 15.1 | 51                         | 12.3 |                      |                                    |                                             |
| Severe                                | 75                      | 15.1 | 71                         | 17.1 |                      |                                    |                                             |
| History of symptoms                   |                         |      |                            |      |                      |                                    |                                             |
| Fever                                 | 344                     | 69.1 | 243                        | 57.7 | <.001                | 1.64 (1.24 to 2.17)                |                                             |
| Cough                                 | 485                     | 97.4 | 403                        | 96   | .22                  | 1.57 (0.71 to 3.57)                |                                             |
| Difficulty breathing                  | 458                     | 92.2 | 403                        | 95.7 | .03                  | 0.52 (0.28 to 0.96)                |                                             |
| Wheeze                                | 147                     | 29.6 | 115                        | 27.4 | .45                  | 1.12 (0.83 to 1.51)                |                                             |
| Weight loss/Inability to gain weight  | 96                      | 19.4 | 56                         | 13.4 | .02                  | 1.55 (1.07 to 2.26)                |                                             |
| Chronic symptoms (>=14 days)          |                         |      |                            |      |                      |                                    |                                             |
| Fever                                 | 3                       | 0.9  | 2                          | 0.9  | 1                    | 1.06 (0.12 to 12.78)               |                                             |
| Cough                                 | 28                      | 5.9  | 10                         | 2.5  | .02                  | 2.42 (1.12 to 5.66)                |                                             |
| Difficulty breathing                  | 8                       | 1.8  | 3                          | 0.8  | .17                  | 2.43 (0.58 to 14.30)               |                                             |
| Wheeze                                | 4                       | 3.1  | 1                          | 0.9  | .38                  | 3.31 (0.32 to 164.36)              |                                             |
| Any of above                          | 32                      | 6.6  | 12                         | 2.9  | .01                  | 2.35 (1.16 to 5.07)                |                                             |
| Clinical signs on admission           |                         |      |                            |      |                      |                                    |                                             |
| Stridor                               | 15                      | 3.0  | 33                         | 7.9  | .001                 | 0.37 (0.18 to 0.71)                |                                             |
| Grunting                              | 32                      | 6.5  | 28                         | 6.7  | .89                  | 0.96 (0.55 to 1.70)                |                                             |
| Nasal flaring                         | 409                     | 82.1 | 359                        | 85.9 | .12                  | 0.76 (0.52 to 1.10)                | 0.15 (0.04 to 0.50)                         |
| Deep breathing                        | 63                      | 12.7 | 73                         | 17.4 | .046                 | 0.69 (0.47 to 1.01)                |                                             |

Supplementary Table 1. Characteristics of Cases with and without Gastric Aspirates (GA) Collected (*continued*)

|                                            | GA Collected<br>(N=498) |            | No GA collected<br>(N=422) |            | P-value <sup>a</sup> | Odds Ratio<br>(95%CI) <sup>b</sup> | Adjusted Odds Ratio<br>(95%CI) <sup>c</sup> |
|--------------------------------------------|-------------------------|------------|----------------------------|------------|----------------------|------------------------------------|---------------------------------------------|
|                                            | n                       | %          | n                          | %          |                      |                                    |                                             |
| Tuberculosis (TB) Medication               |                         |            |                            |            |                      |                                    |                                             |
| TB Meds started on day of admission        | 7                       | 1.4        | 16                         | 3.8        | .02                  | 0.36 (0.13 to 0.95)                | 0.01 (0.00 to 0.34)                         |
| On TB Meds at discharge                    | 91                      | 22.3       | 20                         | 5.6        | <.001                | 4.85 (2.88 to 8.50)                |                                             |
| Positive tuberculin skin test <sup>h</sup> | 49                      | 14.9       | 9                          | 6          | .01                  | 2.74 (1.28 to 6.52)                | 15.45 (2.86 to 83.39)                       |
| Duration of Symptoms (days)                |                         |            |                            |            |                      |                                    |                                             |
|                                            | <b>median</b>           | <b>IQR</b> | <b>median</b>              | <b>IQR</b> |                      |                                    |                                             |
| Fever                                      | 2                       | 1 to 3     | 2                          | 1 to 3     | .11                  | 1.08 (0.98 to 1.19)                |                                             |
| Cough                                      | 3                       | 2 to 4     | 3                          | 2 to 5     | .002                 | 1.04 (1.01 to 1.08)                |                                             |
| Difficulty breathing                       | 2                       | 1 to 3     | 2                          | 1 to 3     | .001                 | 1.08 (1.01 to 1.15)                | 1.78 (1.24 to 2.56)                         |
| Wheeze                                     | 2                       | 1 to 3     | 2                          | 1 to 3     | .28                  | 1.06 (0.96 to 1.17)                |                                             |
| Length of hospitalization (days)           | 7                       | 4 to 10    | 6                          | 4 to 10    | .18                  | 0.99 (0.98 to 1.00)                |                                             |

<sup>a</sup> P-values were obtained using Wilcoxon Rank Sum for continuous variables with skewed distributions, Chi-square for categorical variables and Fishers exact test for categorical variables with fewer than five expected observations in two-by-two tables.

<sup>b</sup> Odds ratios and adjusted odds ratios reflect the odds of gastric aspirate being collected compared to not being collected.

<sup>c</sup> aOR presented for variables included in the final model obtained by performing forward stepwise logistic regression which took into consideration the effects of age at enrolment, clinical history (including failure to gain weight, duration of cough, fever or difficulty breathing and chronic symptomatology), HIV status, pneumonia severity signs on admission (lower chest wall indrawing, head nodding, inability to feed, central cyanosis and lethargy), pneumonia severity categorization, hypoxia on admission, clinical signs on admission (stridor, nasal flaring, deep breathing), timing of initiation of anti-tuberculosis medications, chest X-ray abnormalities, Mantoux response, duration of hospitalization and in-hospital death.

<sup>d</sup> Restricted to 715 children with known vital status at follow-up visit.

<sup>e</sup> Hypoxemia defined as oxygen saturation < 90% on room air, or on supplemental oxygen if no room air reading available.

<sup>f</sup> Tachypnea defined as  $\geq 60$  breaths per minute (bpm) for children <2 months of age,  $\geq 50$  bpm for children 2-11 months, and  $\geq 40$  bpm for children 12-59 month.

<sup>g</sup> Chest radiographs were deemed to be abnormal if alveolar consolidation, other infiltrate, or both were observed on films obtained within 72 hours of hospitalization.

<sup>h</sup> Restricted to 479 children with available Mantoux results.

## **Acknowledgements**

### ***PERCH Study Group. Johns Hopkins Bloomberg School of Public Health, Baltimore, Maryland:***

Katherine L. O'Brien (PI), Orin S. Levine (Former PI, current affiliation Bill & Melinda Gates Foundation, Seattle, Washington), Maria Deloria Knoll (co-PI), Daniel R. Feikin (joint affiliation with Centers for Disease Control and Prevention, Atlanta, Georgia), Andrea N. DeLuca, Amanda J. Driscoll, Nicholas Fancourt, Wei Fu, Laura L. Hammitt, Melissa M. Higdon, E. Wangeci Kagucia, Ruth A. Karron, Mengying Li, Daniel E. Park, Christine Prosperi, Zhenke Wu, Scott L. Zeger; **The Emmes Corporation, Rockville, Maryland:** Nora L. Watson, **Nuffield Department of Clinical Medicine, University of Oxford, United Kingdom:** Jane Crawley; **University of Otago, Christchurch, New Zealand:** David R. Murdoch; **Respiratory and Meningeal Pathogens Research Unit, University of the Witwatersrand , Johannesburg, South Africa:** Shabir A. Madhi (site PI), David P. Moore, Peter V. Adrian, Vicky L. Baillie, Locadiah Kuwanda, Azwifarwi Mudau, Michelle J. Groome, Nasreen Mahomed.

***PERCH Expert Group.*** William C. Blackwelder, Harry Campbell, John A. Crump, Adegoke Falade, Menno D de Jong, Claudio Lanata, Kim Mulholland, Shamim Qazi, Cynthia G. Whitney.

***Pneumonia Methods Working Group.*** Robert E Black, Zulfiqar A Bhutta, Harry Campbell, Thomas Cherian, Derrick W Crook, Menno D de Jong, Scott F Dowell, Stephen M Graham, Keith P Klugman, Claudio F Lanata, Shabir A Madhi, Paul Martin, James P Nataro, Franco M Piazza, Shamim A Qazi, and Heather J Zar.

### ***PERCH Chest Radiograph Reading Panel***

**Readers:** Dr. Kamrun Nahar, Dr. Fariha Bushra Matin, Dr. Claire Oluwalana, Dr. Bernard Ebruke, Dr. Joyce Sande, Dr. Micah Silaba Ominde, Dr. Mahamadou Diallo, Dr. Breanna Barger-Kamate, Dr. Nasreen Mahomed, Dr. David P. Moore, Dr. Anchalee Kruatrachue, Dr. Piyarat Suntarattiwong, Dr. Musaku Mwenechanya, Dr. Rasa Izadnegahdar, **Arbitrators:** Dr. Vera Manduku, Dr. John DeCampo, Dr. Marg DeCampo, Dr. Fergus Gleeson.

### ***PERCH Contributors:***

**South Africa:** Azwidihwi Takalani, Andrea Hugo, Susan Nzenze, Ndulela Titi, Mmabatho Selela, Malebo Motiane, Minah Nkuna, Nonhlanhla Tsholetsane, Sibonsile Moya, Debra Katsi, Tondani Netshishivhe, Lerato Mapetla, Gudani Singo, Simphiwe Gasa, Cece Mgenge, Nozipho Mthunzi, Nombulelo Monedi, Tanja Adams, Shafeeka Mangera, Jeannette Wadula, Peter Tsaagane, Jenifer L. Vaughan, Sakina Loonat, Martin Hale, Sugeshnee Pather, Mariëtte Middel, Siobhan Trenor, Palesa Morailane, Ntombi Maya, Rene Sterley, Charné Combrinck, Given Maletle, Lerato Qoza, Grizelda Liebenberg, Hendrik van Jaarsveld,

Supplemental Materials: Induced Sputum for Child TB Diagnosis

Zunaid Kraft, Lisa-Marie Mollentze, Lourens Combrinck, Tsholofelo Mosome; **Canterbury Health Laboratory, Christchurch, New Zealand:** Trevor P. Anderson, Joanne Mitchell, Rose Watt, Shalika Jayawardena; **The Emmes Corporation, Rockville, Maryland:** Mark Wolff, Megan Sanza, Omid Neyzari.
